# Supplementary material for: Interventions to Reduce Exposures in the Workplace: A Systematic Review of Intervention Studies Over Six Decades, 1960–2019
Source: PubMed Central journal article supplement (PMC7075246; doi:10.3389/fpubh.2020.00067), 2020-03-09
Supplement: Data_Sheet_1.pdf [file Data_Sheet_1.pdf]

***Supplementary file 1. Search terms.***

|                                                                                                                                                                                                                                                                                              |                                                                                                                                                                                                                                                                                                                                                                                               |
|----------------------------------------------------------------------------------------------------------------------------------------------------------------------------------------------------------------------------------------------------------------------------------------------|-----------------------------------------------------------------------------------------------------------------------------------------------------------------------------------------------------------------------------------------------------------------------------------------------------------------------------------------------------------------------------------------------|
| <p><b>Supplementary file 1.</b> Search terms used in Embase to target occupational intervention studies on exposure to chemical and biological agents published 1960-2019. For searches in Medline and Web of Science the same search terms were applied using database-specific syntax.</p> |                                                                                                                                                                                                                                                                                                                                                                                               |
|                                                                                                                                                                                                                                                                                              | <b>Exposures</b>                                                                                                                                                                                                                                                                                                                                                                              |
| #1                                                                                                                                                                                                                                                                                           | ((‘chemic*’:ti,ab OR 'organic dust':ti,ab OR 'dust':ti,ab OR ‘biologic* dust’:ti,ab OR 'fume*':ti,ab OR 'vapor*':ti,ab OR 'fiber*':ti,ab OR 'microorganism*':ti,ab not ‘radiation’:ti,ab) AND ‘exposure’:ti,ab) AND (occupation*':ti,ab OR work*':ti,ab OR job*':ti,ab OR employ*':ti,ab OR factory:ti,ab OR industr*':ti,ab OR ‘person* protect* equip*’:ti,ab)                              |
| #2                                                                                                                                                                                                                                                                                           | 'occupational safety' OR 'chemical exposure'/exp OR 'occupational exposure'/exp OR 'organic dust'/exp OR 'dust'/exp OR ‘biological dust’/exp OR 'fume'/exp OR 'vapor'/exp OR 'fiber'/exp OR 'microorganism'/exp) AND (occupation*':ti,ab OR work*':ti,ab OR job*':ti,ab OR employ*':ti,ab OR factory:ti,ab OR industr*':ti,ab OR ‘person* protect* equip*’:ti,ab)                             |
| #3                                                                                                                                                                                                                                                                                           | ((‘chemic*’:ti,ab OR 'organic dust':ti,ab OR 'dust':ti,ab OR ‘biologic* dust’ OR 'fume*':ti,ab OR 'vapor*':ti,ab OR 'fiber*':ti,ab OR 'microorganism*':ti,ab not ‘radiation’:ti,ab) AND ‘exposure’:ti,ab) AND ('environmental exposure'/exp) AND (occupation*':ti,ab OR work*':ti,ab OR job*':ti,ab OR employ*':ti,ab OR factory:ti,ab OR industr*':ti,ab OR ‘person* protect* equip*’:ti,ab) |
| #4                                                                                                                                                                                                                                                                                           | #1 OR #2 OR #3                                                                                                                                                                                                                                                                                                                                                                                |
|                                                                                                                                                                                                                                                                                              | <b>Intervention types</b>                                                                                                                                                                                                                                                                                                                                                                     |
| #5                                                                                                                                                                                                                                                                                           | ((‘intervention’/exp OR 'intervention study'/exp OR 'control measure*':ti,ab OR intervention*':ti,ab OR ‘person* protect* equip*’:ti,ab) OR (('random*' NEAR/5 'control*'):ti,ab) OR (('control*' NEAR/5 'trial*'):ti,ab)                                                                                                                                                                     |
| #6                                                                                                                                                                                                                                                                                           | #4 AND #5                                                                                                                                                                                                                                                                                                                                                                                     |
|                                                                                                                                                                                                                                                                                              | <b>Excluded outcomes</b>                                                                                                                                                                                                                                                                                                                                                                      |
| #7                                                                                                                                                                                                                                                                                           | #6 NOT ('musculoskeletal system'/exp OR 'mental disease'/exp OR 'stress'/exp OR 'ergonomics'/exp)                                                                                                                                                                                                                                                                                             |

|    |                                                                                                                                                                                |
|----|--------------------------------------------------------------------------------------------------------------------------------------------------------------------------------|
|    |                                                                                                                                                                                |
| #8 | #7 AND ([danish]/lim OR [dutch]/lim OR [english]/lim OR [french]/lim OR [german]/lim OR [norwegian]/lim OR [spanish]/lim OR [swedish]/lim) AND [1-1-1960]/sd NOT [1-1-2020]/sd |
